1 A co-designed website (FindWays) to  
2 improve mental health literacy of  
3 parents of children with mental health  
4 problems: protocol for a pilot  
5 randomised controlled trial.

6  
7

8 Daniel Peyton<sup>1,2\*</sup>, Greg Wadley<sup>3</sup>, Naomi Hackworth<sup>4,5,6</sup>, Anneke Grobler<sup>2,6</sup> and Harriet

9 Hiscock<sup>1,2,7</sup>

10

11

12

13 <sup>1</sup>Health Services and Economics, Murdoch Children's Research Institute, Melbourne,  
14 Victoria, Australia.

15

16 <sup>2</sup>Department of Paediatrics, University of Melbourne, Melbourne, Victoria, Australia.  
17 Australia

18

19 <sup>3</sup>School of Computing and Information Systems, The University of Melbourne

20

21 <sup>4</sup>Judith Lumley Centre, La Trobe University

22

23 <sup>5</sup>Parenting Research Centre, Australia

24

25 <sup>6</sup>Murdoch Children's Research Institute, Australia

26

27 <sup>7</sup>Health Services Research Unit, The Royal Children's Hospital, Melbourne, Victoria,

28

29 \* Corresponding author

30 Email: [daniel.peyton@mcri.edu.au](mailto:daniel.peyton@mcri.edu.au)

31

32

33

NOTE: This preprint reports new research that has not been certified by peer review and should not be used to guide clinical practice.

## 34 **Abstract**

### 35 **Background**

36 Mental health problems, such as behavioural and emotional problems, are prevalent in  
37 children. These problems can have long lasting, detrimental effects on the child, their  
38 parents and society. Most children with a mental health problem do not receive professional  
39 help. Those that do get help can face long wait times. While waiting, parents want to learn  
40 how they can help their child. To address this need, we co-designed a new website to help  
41 parents find ways of helping their child's mental health problem while waiting to get specialist  
42 help.

### 43 **Objectives**

44 To assess the acceptability and feasibility of a new co-designed website, FindWays, through  
45 a pilot randomised controlled trial. The protocol is registered with ISRCTN  
46 (ISRCTN64605513).

### 47 **Methods**

48 This study will recruit up to 60 parents of children aged two-twelve years old referred to a  
49 paediatrician for behavioural and/or emotional problems. Participants will be randomly  
50 allocated by computer generated number sequence to either the intervention or control  
51 group. Intervention group participants will receive access to the FindWays website to help  
52 them manage their child's mental health problem while they wait to see the paediatrician.  
53 Acceptability and feasibility will be assessed over the 4-month intervention through mixed  
54 methods including: recruitment, adherence, retention, net promoter score (quantitative  
55 measures) and semi-structured interviews to gain an in-depth understanding of parents'  
56 experience and potential adverse effects (qualitative measure). Secondary outcomes  
57 measured by parent survey at 4-months post randomisation include child mental health,

58 parent mental health, impact of the child's mental health problem on their functioning and  
59 family, and health service use and associated costs.

## 60 **Results**

61 Recruitment commenced June 2022 with publication expected in October 2023.

## 62 **Conclusion**

63 This study will provide novel data on the acceptability and feasibility of a new website co-  
64 designed with parents to help them find ways of managing their child's behaviour and  
65 emotions.

66

67 Ethics approval granted by The Royal Children's Hospital Human Research Ethics

68 Committee - HREC/75854/RCHM-2021 on 22/4/2022.

69

70

## 71 **Introduction**

## 72 **Background**

### 73 **Mental health problems and their long term effects**

74 Mental health problems, such as disruptive behaviour, anxiety and mood problems, affect  
75 one in three Australian children [1]. These common problems impact children’s short and  
76 long term outcomes including difficulty with relationships [2], reduced educational  
77 achievement [2], increased risk of criminality [3,4], alcohol and drug problems [5] and lower  
78 earning potential [3].

79 Half of all adult mental health disorders start in childhood [6]. Evidence-based treatments  
80 including parenting interventions have been shown to improve child behavioural and  
81 emotional problems, including face to face therapy, group parenting programs (e.g., Tuning  
82 in to Kids) and online parenting interventions (e.g., computer assisted cognitive behaviour  
83 therapy, such as BRAVE online) [7–9]. Often, interventions target the parents given that  
84 parenting is a key modifiable factor in child mental health [10,11].

85 Despite the availability of a range of evidence-based interventions for mental health  
86 problems, most children with a mental health disorder do not receive professional help  
87 [1,12–14]. Reasons for this are multifactorial and include accessibility barriers, stigma, and  
88 poor parental (and professional) mental health literacy [1]. Mental health literacy is the  
89 “knowledge and beliefs about mental disorders which aid their recognition, management or  
90 prevention” [15]<sup>[p182]</sup>. This can include knowing where a child can go to get mental health  
91 help, or strategies parents can implement to help alleviate their child’s problem.

92 Qualitative studies have shown that parents often face difficulty navigating the maze of  
93 services for mental health [16,17]. Parents can find it hard to know where to go or who can  
94 help. Many will end up seeing a paediatrician to help their child [18].

95 In Australia, the paediatrician is the largest provider of longitudinal care of children with a  
96 mental health disorder [1]. Paediatricians are often an ‘early port of call’ for children with  
97 mental health disorders and play a crucial role in diagnosis, exclusion of medical causes of

98 child mental health problems and prescription of medication. Paediatricians generally do not  
99 deliver behaviour management therapy nor are they trained in cognitive behavioural therapy.  
100 They generally refer to other providers for these interventions.

101 With few publicly funded paediatric services available, anecdotal reports suggest wait times  
102 in excess of six to twelve months to access a paediatrician in Australia. Pre-COVID (2019),  
103 mean wait time to access a paediatrician in the states of Victoria and South Australia was 44  
104 days with four out of 10 providers closing their books to new patients mid-year [19]. This  
105 problem of accessibility has worsened due to the COVID-19 pandemic, especially for  
106 families who cannot afford private care.

### 107 **Parents want support and information while they wait to see a mental health specialist**

108 Parents want information while they wait to access mental health care [20]. This includes a  
109 better understanding of how the mental health system works and how to access other forms  
110 of treatment to help their child while they wait, such as group therapy, online interventions or  
111 telephone support [20].

112 There is little qualitative data on parent's information preferences while waiting to see a  
113 specialist mental health professional. From first author's qualitative interviews with 16  
114 parents waiting to get help from a paediatrician (unpublished data), inductive content  
115 analysis revealed that parents want to understand whether their child's problem is normal or  
116 not, what they could try while they waited to see the paediatrician, which services could help  
117 their child's problem, and a list of available professional help in their community.

### 118 **Why a digital health intervention might help**

119 Digital health interventions (DHIs) may be able to address these information gaps identified  
120 by parents. DHIs are desirable for the following reasons: they facilitate the rapid exchange of  
121 tailored information to consumers, are scalable, are liked by parents, can have vast reach,  
122 are accessible on demand, and generally thought to be cost-effective [21].

123 Our recent systematic review identified only five studies examining the effects of a DHI on  
124 parents' mental health literacy or help-seeking for their child's mental health problem [22].

125 There is some evidence that DHIs, such as websites and emailed PowerPoint presentations,  
126 may help improve mental health literacy [23–25]. However, the review included only one  
127 randomised controlled trial [26]. A Finnish study measured help-seeking behaviours of  
128 parents of four year old children with a recognised behaviour problem at a routine four year  
129 old check with a universal service. The randomised controlled trial found an information  
130 website, coupled with a telephone coach decreased uptake of services. However, this  
131 decrease in uptake of services was associated with improved child behaviour using a  
132 validated measure. This study showed a DHI, with a telephone coach, can affect help-  
133 seeking [26]. However, no quantitative studies have shown DHIs can improve uptake of  
134 services for children with a mental health problem.

### 135 **A new co-designed website to improve help-seeking and child mental health** 136 **outcomes**

137 To design a new website to improve parents' knowledge of treatments and reduce barriers to  
138 accessing evidence-based therapies for their child, we followed a framework proposed by  
139 Gemert-Pijen et al [27]. This is a user-centred, iterative approach that refines the DHI to  
140 match the needs of the user, during every phase of the development cycle [27]. The website  
141 was developed in collaboration with parents and clinicians. As part of this process, we  
142 undertook a contextual enquiry with parents, three co-design workshops and six one-on-one  
143 usability studies. Through this process, we designed and developed a website with the  
144 content detailed in the intervention section below.

### 145 **Evaluating the feasibility and acceptability of the DHI**

146 The World Health Organisation recommends evaluating the feasibility of a new DHI, after  
147 usability testing and prior to efficacy and effectiveness evaluation [28]. The measurement of  
148 feasibility is complicated by the absence of a singular definition of feasibility testing, and the  
149 synonymous use of feasibility studies and pilot studies [29,30]. Feasibility trials typically  
150 involve 20-100 participants, and evaluate the suitability of outcome measures, participant

151 acceptance of the intervention (recruitment and retention rates) and DHI usage (e.g.  
152 adherence) [28–32].  
153 From our systematic review of five included studies, we found single cohort trials limited the  
154 strength of evidence of effectiveness as this methodology is inherently prone to confounding  
155 bias [33]. None of the included studies in the systematic review identified or adjusted for the  
156 presence of confounding. To address this, we plan to conduct a randomised controlled pilot  
157 study with a “routine care” control group. This also allows us to describe differences in  
158 efficacy of secondary outcomes between the two groups, accounting for confounding and  
159 natural history of child mental health problems over time.

160

## 161 **Aim**

162 We aim to assess the acceptability and feasibility of a co-designed website, FindWays,  
163 through a pilot randomised controlled trial using one-to-one allocation in parallel arms. The  
164 study will also assess efficacy for outcomes related to child mental health, parent mental  
165 health, family impact and health service use and costs.

## 166 **Hypothesis**

167 We hypothesise that FindWays is an acceptable and feasible DHI with the potential to help  
168 parents find ways to improve their child’s mental health problems while they wait to see a  
169 paediatrician.

170

## 171 **Methods**

### 172 **Trial design**

173 We will conduct a pilot randomised controlled trial with participants randomly assigned to  
174 receive either the FindWays website (intervention group) or routine care (control group). We  
175 will use a mixed methods evaluation to determine acceptability and feasibility.

176

## 177 **Setting**

178 Participants will be recruited from three general paediatric private outpatient clinics in  
179 Geelong, Australia. Geelong is the largest regional city in the state of Victoria. 51,804  
180 children under the age of 15 live in Geelong [34]. At the start of recruitment, there were no  
181 public general paediatric outpatient clinics. The list of recruitment sites is available from the  
182 website <https://tiny.one/findways>.

183

## 184 **Eligibility**

185 Participants in the study must be a parent of a child referred by a general practitioner (family  
186 doctor) to a paediatrician at one of three private paediatric clinics, for a first appointment to  
187 evaluate or manage their child's behavioural or emotional problem. Participants will be  
188 assigned to a randomised trial intervention only if they meet all the inclusion criteria and  
189 none of the exclusion criteria. Only one parent of a child will be enrolled.

### 190 **Inclusion criteria**

191 Each participant must meet all the following criteria to be enrolled in this trial:

- 192 • is a parent or carer of a child between two and 12 years old at the time of  
193 randomisation;
- 194 • has been referred for a first appointment with a paediatrician to manage a child's  
195 behavioural or emotional problem;
- 196 • child has a behavioural or emotional problem as listed for review on the referral letter  
197 from the child's general practitioner; and
- 198 • provides verbal consent that is signed and dated by the researcher (DP).

### 199 **Exclusion criteria**

200 Participants meeting any of the following criteria will be excluded from the trial:

- 201 • child has a parent-reported diagnosis of an Intellectual Disability or Autism Spectrum  
202 Disorder;



- 203       • child is in out of home care; or
- 204       • paediatrician decides the child needs an early review (such as for a severe mental
- 205       health problem or to exclude a medical problem).

206

## 207 **Intervention**

### 208 **Purpose**

209 The intervention consists of a new, co-designed website. This website, FindWays, offers

210 parents relevant and specific information on behavioural and emotional problems. This

211 information focuses on ways parents can manage a behavioural or emotional problem.

### 212 **Theory**

213 Human-centred and participatory design methods were used to inform the website's design,

214 as was persuasive technology [35]. These methods align with those suggested by existing

215 theoretical framework for DHIs [27]. In order to encourage behaviour change, the UK

216 Behavioural Insights Team EAST behavioural insights were applied to the design and

217 content of website [36]. The behavioural insights team recommend four principles to

218 encourage a behaviour: make is easy, attractive, social and timely [36].

### 219 **Contextual enquiry**

220 The content of the website was informed by inductive content analysis of 16 qualitative

221 interviews completed in early 2020 by DP with parents recently referred to a paediatrician to

222 manage their child's behavioural or emotional problem.

### 223 **Prototyping**

224 We conducted a further three co-design sessions in 2022 with five parents to inform the

225 functional requirements and look and feel of the website. We designed the intervention using

226 an iterative process, sketching wireframes and mock-ups of the website using free sketch on

227 pen and paper, PowerPoint, Adobe XD and finally in Figma, and asking parents for feedback

228 on content and usability. The development of the prototype in Figma and the website in

229 Webflow was assisted by digital technology design company *Curve Tomorrow* [37]. The  
230 prototype was built in Webflow utilising the Content Management System. Usability testing  
231 was completed with a further six parents. These usability tests were completed as one-on-  
232 one interviews, either face-to-face in a paediatric clinic or over Zoom.

### 233 **Technical**

234 This static website contains 60 pages of content, 47 videos and a list of 63 local and online  
235 services for child mental health, hosted on Webflow. The parent can select specific ages  
236 (preschool or primary school aged) and problems (15 in total) to find tailored information  
237 relevant to their child.

### 238 **Content**

239 The website contains the following elements: i) strategies for parents to try at home based  
240 on a program logic that identifies evidence-based strategies associated with positive child  
241 mental health outcomes, ii) descriptions of the roles of professionals and programs that can  
242 help a child's mental health problem, and iii) lists of local professionals and available  
243 programs. The website content includes videos, written content, and links to relevant  
244 external content and services, including local psychologists, occupational therapists and  
245 evidence-based programs. The content is tailored to the child's age and specific sub-  
246 problem (e.g., separation anxiety, tantrums), as identified by the parent. The parent can  
247 choose what help they want for their child, but the website guides parents, who self-identify  
248 through the website that they want more help, to a local professional or program that can  
249 help their child's specific sub-problem.

250 The parenting strategies provided by the website reference existing information sources  
251 such as the Raising Children Network, Beyond Blue and the Diagnostic Standard Manual-V  
252 (DSM-V) [38]. The Raising Children Network and Beyond Blue are both Australian websites  
253 providing mental health content for consumers, funded in part by the Australian Government.  
254 DSM-V is a diagnostic tool, published by the American Psychiatric Association (APA) and  
255 used by clinicians as a standardised guide to classify mental health disorders [38].

256 All content on FindWays was written by first author DP, a general paediatrician. The content  
257 underwent a quality review process including review by another paediatrician (HH). Video  
258 scripts were reviewed and approved by the paediatricians in Geelong. The content was also  
259 reviewed by NH (a psychologist and Director, Raising Children Network) to ensure the tone  
260 is appropriate for families.

### 261 **Prompts**

262 Throughout the intervention, parents will receive scheduled prompts to use the website.  
263 These prompts, delivered by SMS and email, will contain static information drawn from the  
264 website, and a link to the website. These will be delivered at regular, pre-scheduled intervals  
265 and are not tailored. Parents will be able to request the prompts stop at any time, either by  
266 email or text message.

### 267 **Control group**

268 The control group will receive routine care. This care is provided by usual providers (e.g.,  
269 GP, existing online resources, teachers at school). The control group will not be provided  
270 access to the FindWays website. The FindWays website is not listed on search engines, and  
271 the URL is not publicly available.

272

### 273 **Outcomes**

274 Outcomes of this trial will be measured using mixed methods. Data will be collected at  
275 baseline and at four months post randomisation, except for DHI usage data which will be  
276 measured continuously by Google Analytics and downloaded manually every month during  
277 the trial.

### 278 **Primary outcomes measures**

279 Measures of feasibility and acceptability include recruitment rates, attrition rates, evidence of  
280 harm, user satisfaction and DHI usage [28,29] and will be assessed in the following ways:

- 281 • feasibility will be measured by recruitment rates including the proportion of potentially  
282 eligible parents who consent to participate in the study and complete outcome  
283 measures;
- 284 • adherence will be measured by the number of consenting participants in the  
285 intervention group who access the website as measured by Google Analytics;
- 286 • At 4-months post randomisation:
  - 287 ○ acceptability measured by likelihood of recommending the intervention  
288 measured by Likert scale Net Promoter Score
  - 289 ○ acceptability measured by usability and safety feedback measured by semi-  
290 structured phone interview
  - 291 ○ retention measured by number of consented parents who complete all  
292 baseline measures and final measures
  - 293 ○ adherence measured by tasks completed on the website (e.g., strategies  
294 found, suitable providers found) measured by parent survey.

### 295 **Secondary outcome measures**

296 Secondary outcomes measured by parent-reported surveys at 4-months post randomisation  
297 include:

- 298 • Child behaviour and emotions measured by the Strengths and Difficulties  
299 Questionnaire (SDQ) - a 25-item, validated measure of psychological attributes for 2-  
300 17 year olds, as reported by the parents [39].
- 301 • Family impact, degree of burden and impairment from the child's behaviour and  
302 emotions as measured by parent-reported SDQ Impact Supplement [40].
- 303 • Parent mental health and distress as measured by the Depression, Anxiety and  
304 Stress Scale (DASS-21), a 21-item, validated measure of adult emotions [41,42].
- 305 • Health services use for the child's emotional or behavioural problems, and out of  
306 pocket costs in Australian dollars, as reported by parents.

307 Demographic characteristics of the user will be recorded by parent survey at baseline.

308

309 **Table 1. Study objectives, data sources, data collection time points and outcome measures.**

| <b>Demographic data, Primary and Secondary Objectives</b>             | <b>Data Sources</b>          | <b>Method of collection</b>                                                                | <b>Data Collection Time points</b>                           | <b>Outcomes</b>                                                                                                                                                                                                                                                          |
|-----------------------------------------------------------------------|------------------------------|--------------------------------------------------------------------------------------------|--------------------------------------------------------------|--------------------------------------------------------------------------------------------------------------------------------------------------------------------------------------------------------------------------------------------------------------------------|
| <b>Primary outcomes</b>                                               |                              |                                                                                            |                                                              |                                                                                                                                                                                                                                                                          |
| <b>Feasibility – recruitment and retention</b>                        | Clinic database              | Print copy of database                                                                     | Recorded at weekly intervals for the duration of recruitment | How many eligible patients were flagged by the paediatrician, how many were contacted by the clinic, and how many agreed to pass on their details to the researcher and how many were randomised to the intervention/control, and completed their survey at four months. |
| <b>Adherence and usage (intervention group only)</b>                  | Google Analytics             | Data extracted manually from Google Analytics                                              | Baseline and Weekly intervals for 4 months                   | Number of page views, individual sessions, time spent on each page for each participant.<br><br>Strategies viewed, provider profiles viewed, programs viewed.                                                                                                            |
| <b>Acceptability – usability and safety (intervention group only)</b> | Parent qualitative Interview | Qualitative interview with a subsample of approximately 20 parents from Intervention group | 4 months                                                     | Understanding of the parent’s experience of using the platform, facilitators, and barriers to use, and any perceived adverse outcomes                                                                                                                                    |
| <b>Adherence – task completion (intervention group only)</b>          | Parent Survey                | Online via REDCap                                                                          | 4 months                                                     | Whether parents reported viewing any of the resources within the website, and whether this changed the parent’s behaviour (e.g., help-seeking, implementing new strategies)                                                                                              |
| <b>Acceptability - recommendation (intervention group only)</b>       | Parent Survey                | Online via REDCap                                                                          | 4 months                                                     | Net Promoter Score measured via 10-point Likert scale.                                                                                                                                                                                                                   |
| <b>Secondary outcomes</b>                                             |                              |                                                                                            |                                                              |                                                                                                                                                                                                                                                                          |
| <b>Secondary outcome: child behaviour and emotions</b>                | Parent Survey                | Control and intervention group surveys completed online via REDCap.                        | Baseline and 4 months                                        | Strengths and Difficulties Questionnaire <sup>a</sup> (SDQ)                                                                                                                                                                                                              |
| <b>Family impact of child’s behaviour and emotions</b>                | Parent survey                | Control and intervention group surveys completed online via REDCap.                        | Baseline and 4 months                                        | SDQ Impact Supplement <sup>a</sup> measuring the impact of the child’s behaviour and emotions on their functioning and the family.                                                                                                                                       |

|                                                             |               |                                                                     |                       |                                                                                                                                                                                                         |
|-------------------------------------------------------------|---------------|---------------------------------------------------------------------|-----------------------|---------------------------------------------------------------------------------------------------------------------------------------------------------------------------------------------------------|
| <b>Secondary outcome: Parent mental health and distress</b> | Parent Survey | Control and intervention group surveys completed online via REDCap. | Baseline and 4 months | Depression, Anxiety and Stress Scale <sup>a</sup> (DASS-21)                                                                                                                                             |
| <b>Secondary outcome: Health service use</b>                | Parent Survey | Control and intervention group surveys completed online via REDCap. | Baseline and 4 months | Survey of services used in the past 4 months for the child's emotional or behavioural problems, including number of times accessed, distance travelled to service, and any out of pocket costs (\$AUD). |

310 <sup>a</sup>Validated measure

311

## 312 **Participant timelines**

313 Participants will be recruited over an estimated three-month period in mid 2022 using a  
 314 rolling recruitment strategy. After participants have consented and completed their baseline  
 315 measures, they will be randomised and followed over 4 months. At the end of the 4 months,  
 316 participants will fill out a second survey. Those in the intervention group will be invited to  
 317 participate in a semi-structured interview. A visual summary of the timeline and assessment  
 318 points can be found in Fig 1.

319

320 **Fig 1. SPIRIT schedule of enrolment, interventions, and assessments.**

321

## 322 **Sample size**

323 There is no consistent advice regarding the number of participants required to assess  
 324 acceptability and feasibility. Typically, between 20-100 participants are recruited into similar  
 325 trials assessing acceptability, feasibility and usability [28,30,32]. For this trial, we anticipate  
 326 recruiting up to 60 participants, within a three month time frame. As a pilot RCT, the trial is  
 327 not powered to evaluate effectiveness of the intervention compared to control for parent,  
 328 child or health service-related outcomes.

329

## 330 **Recruitment**

331 The study design, including recruitment and allocation, is summarised in Fig 2.

332

333 **Fig 2. CONSORT flow diagram.** Study design flowchart of the FindWays trial.

334

### 335 **Screening eligible referrals**

336 Paediatricians will screen incoming referrals for eligibility. Paediatricians will flag referrals as  
337 potentially eligible if they appear to meet inclusion criteria and do not meet exclusion criteria.

338 These potentially eligible participants will then be contacted via telephone by the

339 administration staff at each clinic. The administration staff will request consent to pass on

340 the parent's contact details to DP to hear more about the study. Those who do not consent

341 to passing on their contact details will have their non-consent recorded without any

342 identifying information, to help ascertain recruitment rates.

### 343 **Phone parents direct**

344 For those parents who wish to hear more about the study, the administration staff will take

345 and record verbal consent from the parent to pass on their contact details (parent name,

346 email address, phone number and postcode) to DP. At this time, the clinic will also post the

347 parents a copy of the participant information statement. DP will then contact the parents to

348 tell them more about the study, check they received the participant information statement

349 and answer any questions.

350

## 351 **Assignment of interventions**

### 352 **Sequence Generation**

353 A statistician, not involved in the analysis of the trial results, will prepare the randomisation

354 schedule. The randomisation schedule will be created using computer-generated random

355 numbers before the first participant has been recruited, in a one-to-one ratio. The participant

356 cohort will be stratified by child age (two-six year olds and seven-twelve year olds) and clinic  
357 (clinic one, clinic two and clinic three). Within each stratum, permuted block randomisation  
358 will be used to ensure balance between the intervention and control group. A randomly  
359 generated sequence of block sizes containing two, four, or six participants will be used. This  
360 will help prevent any predictability when randomising participants to intervention or control  
361 [43].

### 362 **Allocation concealment**

363 The schedule will be held by the independent statistician, and allocation will not be revealed  
364 prematurely to DP. Because of these procedures, the research team will be unable to predict  
365 which group participants will be allocated to.

### 366 **Implementation**

367 When a participant has consented to participate, and completed their baseline measures,  
368 DP will contact the independent statistician so they can reveal the participant's  
369 randomisation status. Both DP and the participant will become aware of which trial group  
370 they were allocated to after randomisation.

371

### 372 **Blinding**

373 The participant and researcher will not be blind to their intervention status because it is  
374 impossible to blind a novel website intervention to participants. The administration staff and  
375 paediatricians will not be notified by the researchers of the intervention status of the  
376 participants.

377

### 378 **Withdrawing from the trial**

379 Participants are free to withdraw from the trial at any time upon request. If known, a brief  
380 reason will be recorded on the participant database. All parents in the intervention group  
381 who withdraw will be asked if they are still willing to participate in the final interview to  
382 understand their experience using the platform. Withdrawing from the trial will not affect their



383 access to standard treatment or their relationship their paediatrician. If they withdraw, they  
384 will no longer have access to the FindWays website.

385

### 386 **Ancillary and post-trial care**

387 Participants in the intervention group will have ongoing access to the FindWays website after  
388 the trial is over. Participants in the control group will also have access to the FindWays  
389 website after completion of their final survey four months after randomisation. Participants in  
390 both the intervention and control group will be free to utilise any treatments (other than the  
391 intervention) available to them.

392

### 393 **Data collection and management**

394 Data will be collected and entered using electronic data collection forms which will be  
395 completed by the participant. Website usage data will be collected by Google Analytics and  
396 manually transferred across to the relevant participant record on REDCap, by DP. Google  
397 Analytics collects website usage data. For this trial, each participant will be sent a unique link  
398 with an individual Google Analytics tracking code. Google Analytics will then be able to show  
399 individual usage data for each participant.

400 Participants in the intervention group will be asked if they are willing to participate in an  
401 optional telephone semi-structured interview. DP will conduct all the phone interviews as per  
402 the interview guide. The interview will last approximately 20-30 minutes and is designed to  
403 better understand the parent's experience using the platform, enquire about any adverse  
404 events (including safety issues), barriers to use, or ways the website could be improved.

405 Participant interviews will be recorded via dictaphone and all audio recordings will be  
406 transcribed verbatim.

407 Hard copy data will be stored in a locked cabinet in a secure location, accessible to the  
408 research team only. Electronic data will be securely stored in MCRI's REDCap database  
409 system and in files stored in MCRI's network file servers, which are backed up nightly.

410 REDCap is hosted on MCRI infrastructure and is subject to the same security and backup  
411 regimen as other systems (e.g., the network file servers).

412

### 413 **Statistical analysis**

414 The baseline characteristics of the intervention and control groups will be summarised and  
415 presented separately. The primary outcome data will be summarised and presented as  
416 percentages.

417 For secondary outcomes linear regression and logistic regression will be conducted to  
418 estimate mean differences (and 95% confidence intervals) for continuous outcomes, and  
419 odds ratios (and 95% confidence intervals) for binary outcomes, respectively, between trial  
420 groups. Analyses will be adjusted for baseline scores of the outcome measure. This pilot  
421 RCT will be reported in accordance with the CONSORT e-health statement and we will  
422 complete an intention-to-treat analysis at the level of the child [44].

423 Qualitative interviews will be analysed using an inductive content analysis approach. This  
424 approach employs three main phases: i) open coding; ii) creating categories by cross  
425 referencing, and grouping the data; and, iii) abstraction [45,46]. This analysis will be  
426 conducted using NVivo software. Data will be coded by DP and discussed with supervising  
427 authors on a regular basis. The coding framework will be reviewed by each of the co-  
428 authors. The analysis will describe key themes and events in parents' experience using the  
429 FindWays website.

430

### 431 **Ethical considerations**

432 This protocol, the informed consent document and any subsequent amendments was  
433 reviewed and approved by The Royal Children's Hospital Human Research Ethics  
434 Committee (HREC) prior to commencing the research. A letter of protocol approval by HREC  
435 was obtained prior to the commencement of the trial, as well as approval for other trial

436 documents requiring HREC review. Amendments will be communicated to investigators,  
437 ISRCTN and publishing journals.

438 The protocol is registered on ISRCTN (ISRCTN64605513). As this is a pilot study, a data  
439 monitoring committee is not necessary and interim analysis will not be conducted. Safety is  
440 being measured by recording individual level quantitative participant data on mental health  
441 and health service-related outcomes, as well as through qualitative interviews offered to all  
442 participants in the intervention group.

443 DP will conduct the informed consent discussion and will check that the parent comprehends  
444 the information provided. DP will answer any questions about the trial.

445 The parent will be invited to provide verbal consent. Consent will be voluntary and free from  
446 coercion. Optional consent will be obtained by DP from participants in the intervention group,  
447 who choose to participate in the semi-structured interview four months after randomisation.

448 Participant confidentiality is strictly held in trust by the participating investigators, research  
449 staff, and the sponsor. This confidentiality is extended to cover the health information of the  
450 participants and will not be released without written permission of the participant, except as  
451 necessary for monitoring by HREC or regulatory agencies, or as required by law.

452

### 453 **Declaration of interests**

454 None to declare

455

### 456 **Dissemination policy and results**

457 Upon completion of the study, results will be disseminated via four methods: i) Publication of  
458 results in a peer-reviewed journal; ii) presentation of results at conferences; iii) presentation  
459 of results to local paediatricians in Geelong; and iv) plain language summary of results  
460 distributed to parents agreeing to receive pilot results.

461 Up to July 2022, eight participants have been recruited. Participants are expected to be  
462 enrolled until October 2022. The final outcome measures are expected to be collected in  
463 March 2023, with publication of results expected in October 2023.

464 The authors do not intend to use professional writers for any part of the publication.

465

## 466 **Discussion**

467 This pilot RCT will determine whether a co-designed DHI, designed to help parents find  
468 strategies and services to help their child, is feasible and acceptable among parents referred  
469 to a paediatrician for their child's behavioural or emotional problems. This will be the first  
470 evaluation of its kind of a DHI for parents targeting mental health problems in young children.

471 It will also be the first randomised trial to measure the effects of a self-directed website  
472 targeting parents on uptake of mental health services.

473 Limitations of this protocol include parents being recruited from a single regional city, and the  
474 study not sufficiently powered to evaluate for efficacy of the website. However, following the  
475 pilot RCT, we plan to conduct a fully powered RCT to determine the effectiveness and cost-  
476 effectiveness of this intervention in reducing the need for paediatrician services and  
477 improving child and parent outcomes.

478 In the long term, the FindWays website is potentially impactful because: i) it may help  
479 families improve their child's behaviour and emotions, without needing to see a  
480 paediatrician, or ii) they can find and engage with available evidence-based services earlier.

481 Mental health workers may also find the website useful for identifying strategies, programs  
482 and providers that are known to help children with a particular issue and available in their  
483 community. These mental health workers could include wellbeing officers at schools, general  
484 practitioners, well child/family nurses, and even paediatricians.

485 If this DHI is a feasible and acceptable way of linking some families to the right treatments,  
486 without the need to consult a paediatrician, it could increase the efficiency of the health

487 system. With fewer families on waitlists, children with more complex or severe problems may  
488 be seen sooner. The overall capacity of the health system may be increased as we expect  
489 families to access group parenting programs and scalable online programs, where there is  
490 capacity to see more children than through individual face-to-face appointments with a  
491 specialist.

492

493

494

## 495 Acknowledgements

496 The authors would like to acknowledge the co-design participants for their valuable input.

497 The Victorian Government's Operational Infrastructure Support Program support research at

498 the Murdoch Children's Research Institute.

499

## 500 References

- 501 1. Lawrence D, Johnson S, Hafekost J, Boterhoven de Haan K, Sawyer M, Ainley J, et  
502 al. The Mental Health of Children and Adolescents. Report on the second Australian  
503 Child and Adolescent Survey of Mental Health and Wellbeing. Canberra: Department  
504 of Health; 2015. 1–236 p.
- 505 2. Duchesne S, Vitaro F, Larose S, Tremblay RE. Trajectories of anxiety during  
506 elementary-school years and the prediction of high school noncompletion. *J Youth*  
507 *Adolesc.* 2008;37(9):1134–46.
- 508 3. Asendorpf JB, Denissen JJA, van Aken MAG. Inhibited and Aggressive Preschool  
509 Children at 23 Years of Age: Personality and Social Transitions into Adulthood. *Dev*  
510 *Psychol.* 2008;44(4):997–1011.
- 511 4. Stevenson J, Goodman R. Association between behaviour at age 3 years and adult  
512 criminality. *Br J Psychiatry.* 2001;179(SEPT.):197–202.
- 513 5. Woodward LJ, Fergusson DM. Life course outcomes of young people with anxiety  
514 disorders in adolescence. *J Am Acad Child Adolesc Psychiatry.* 2001;40(9):1086–93.
- 515 6. Kessler RC, Berglund P, Demler O, Jin R, Merikangas KR, Walters EE. Lifetime  
516 Prevalence and Age-of-Onset Distributions of. *Arch Gen Psychiatry* [Internet].  
517 2005;62(June):593–602. Available from:  
518 <http://archpsyc.jamanetwork.com/article.aspx?doi=10.1001/archpsyc.62.6.593>
- 519 7. Havighurst SS, Wilson KR, Harley AE, Prior MR, Kehoe C. Tuning in to Kids:  
520 improving emotion socialization practices in parents of preschool children—findings  
521 from a community trial. *J Child Psychol Psychiatry.* 2010;51(12):1342–50.
- 522 8. March S, Spence SH, Donovan CL. The Efficacy of an Internet-based CBT  
523 Intervention for Child Anxiety Disorders. *J Pediatr Psychol.* 2009;34(5):474–87.
- 524 9. Merry SN, Stasiak K, Shepherd M, Frampton C, Fleming T, Lucassen MFG. The  
525 effectiveness of SPARX, a computerised self help intervention for adolescents  
526 seeking help for depression: Randomised controlled non-inferiority trial. *BMJ*  
527 [Internet]. 2012;344(7857):1–16. Available from:  
528 <http://dx.doi.org/doi:10.1136/bmj.e2598>
- 529 10. Kiernan KE, Mensah FK. Poverty, family resources and children's early educational  
530 attainment: The mediating role of parenting. *Br Educ Res J.* 2011;37(2):317–36.
- 531 11. Gardner F, Shaw DS. Behavioral problems of infancy and preschool children (0–5).  
532 *Rutter's child Adolesc psychiatry.* 2008;5:882–92.
- 533 12. Sadler K, Vizard T, Ford T, Marchesell F, Pearce N, Mandalia D, et al. Mental health  
534 of children and young people in England, 2017. 2018;
- 535 13. US Department of Health and Human Services. Mental health: A report of the  
536 Surgeon General. 1999;
- 537 14. Jensen PS, Goldman E, Offord D, Costello EJ, Friedman R, Huff B, et al. Overlooked  
538 and underserved:“action signs” for identifying children with unmet mental health  
539 needs. *Pediatrics.* 2011;128(5):970–9.

- 540 15. Jorm AF, Korten AE, Jacomb PA, Christensen H, Rodgers B, Pollitt P. "Mental health  
541 literacy": A survey of the public's ability to recognise mental disorders and their  
542 beliefs about the effectiveness of treatment. *Med J Aust.* 1997;166(4):182–6.
- 543 16. Reardon T, Harvey K, Baranowska M, O'Brien D, Smith L, Creswell C. What do  
544 parents perceive are the barriers and facilitators to accessing psychological  
545 treatment for mental health problems in children and adolescents? A systematic  
546 review of qualitative and quantitative studies. *Eur Child Adolesc Psychiatry.*  
547 2017;26(6):623–47.
- 548 17. Boulter E, Rickwood D. Parents' experience of seeking help for children with mental  
549 health problems. *Adv Ment Heal.* 2013;11(2):131–42.
- 550 18. Johnson SE, Lawrence D, Hafekost J, Saw S, Buckingham WJ, Sawyer M, et al.  
551 Service use by Australian children for emotional and behavioural problems: Findings  
552 from the second Australian Child and Adolescent Survey of Mental Health and  
553 Wellbeing. *Aust New Zeal J Psychiatry.* 2016;50(9):887–98.
- 554 19. Mulraney M, Lee C, Freed G, Sawyer M, Coghill D, Sciberras E, et al. How long and  
555 how much? Wait times and costs for initial private child mental health appointments.  
556 *J Paediatr Child Health.* 2021;57(4):526–32.
- 557 20. Cunningham CE, Chen Y, Deal K, McGrath P, Reid G, Lipman E, et al. The Interim  
558 Service Preferences of Parents Waiting for Children's Mental Health Treatment: A  
559 Discrete Choice Conjoint Experiment. *J Abnorm Child Psychol.* 2013;41(6):865–77.
- 560 21. World Health Organisation. WHO guideline: recommendations on digital interventions  
561 for health system strengthening. Geneva; 2019.
- 562 22. Peyton D, Goods M, Hiscock H. The Effect of Digital Health Interventions on Parents'  
563 Mental Health Literacy and Help Seeking for Their Child's Mental Health Problem:  
564 Systematic Review. *J Med Internet Res.* 2022;24(2):e28771.
- 565 23. Sapru I, Khalid-Khan S, Choi E, Alavi N, Patel A, Sutton C, et al. Effectiveness of  
566 online versus live multi-family psychoeducation group therapy for children and  
567 adolescents with mood or anxiety disorders: A pilot study. *Int J Adolesc Med Health.*  
568 2018;30(4).
- 569 24. Ryan GS, Haroon M, Melvin G. Evaluation of an educational website for parents of  
570 children with ADHD. *Int J Med Inform [Internet].* 2015;84(11):974–81. Available from:  
571 <http://dx.doi.org/10.1016/j.ijmedinf.2015.07.008>
- 572 25. Montoya A, Hernández S, Massana M, Fernández-Jaén A, Herreros O, Diez JA, et  
573 al. Evaluating internet information on attention-deficit/hyperactivity disorder (ADHD)  
574 treatment: Parent and expert perspectives. *Educ Heal.* 2013;26(1):48–53.
- 575 26. Sourander A, McGrath PJ, Ristkari T, Cunningham C, Huttunen J, Hinkka-Yli-  
576 Salomäki S, et al. Two-Year Follow-Up of Internet and Telephone Assisted Parent  
577 Training for Disruptive Behavior at Age 4. *J Am Acad Child Adolesc Psychiatry.*  
578 2018;57(9):658-668.e1.
- 579 27. van Gemert-Pijnen JEW, Nijland N, van Limburg M, Ossebaard HC, Kelders SM,  
580 Eysenbach G, et al. A holistic framework to improve the uptake and impact of  
581 eHealth technologies. *J Med Internet Res.* 2011;13(4).
- 582 28. Monitoring and evaluating digital health interventions: a practical guide to conducting  
583 research and assessment [Internet]. Geneva: World Health Organization; 2016.  
584 Available from: <http://apps.who.int/bookorders>.
- 585 29. Eldridge SM, Lancaster GA, Campbell MJ, Thabane L, Hopewell S, Coleman CL, et  
586 al. Defining feasibility and pilot studies in preparation for randomised controlled trials:  
587 development of a conceptual framework. *PLoS One.* 2016;11(3):e0150205.
- 588 30. Karimi N, Crawford D, Opie R, Maddison R, O'Connell S, Hamblin PS, et al.  
589 EatSmart, a web-based and mobile healthy eating intervention for disadvantaged  
590 people with type 2 diabetes: Protocol for a pilot mixed methods intervention study.  
591 *JMIR Res Protoc.* 2020;9(11):e19488.

- 592 31. Hilliard ME, Eshtehardi SS, Minard CG, Saber R, Thompson D, Karaviti LP, et al.  
593 Strengths-based behavioral intervention for parents of adolescents with type 1  
594 diabetes using an mHealth app (type 1 doing well): Protocol for a Pilot Randomized  
595 Controlled trial. *JMIR Res Protoc*. 2018;7(3):e9147.
- 596 32. Sanci L, Kauer S, Thuraisingam S, Davidson S, Duncan A-M, Chondros P, et al.  
597 Effectiveness of a mental health service navigation website (link) for young adults:  
598 randomized controlled trial. *JMIR Ment Heal*. 2019;6(10):e13189.
- 599 33. Sterne JAC, Hernán MA, Reeves BC, Savović J, Berkman ND, Viswanathan M, et al.  
600 ROBINS-I: a tool for assessing risk of bias in non-randomised studies of  
601 interventions. *bmj*. 2016;355.
- 602 34. Australian Bureau of Statistics. Geelong: 2016 Census All persons QuickStats  
603 [Internet]. 2016 [cited 2022 Jul 29]. Available from:  
604 [https://www.abs.gov.au/census/find-census-data/quickstats/2016/203#:~:text=In the](https://www.abs.gov.au/census/find-census-data/quickstats/2016/203#:~:text=In%20the%202016%20Census%2C%20there%2C%20up%201.0%25%20of%20the%20population.&text=The%20median%20age%20of%20people%20in%20Geelong%20was%2040%20years.)  
605 [2016 Census%2C there,up 1.0%25 of the population.&text=The median age of](https://www.abs.gov.au/census/find-census-data/quickstats/2016/203#:~:text=In the%202016%20Census%2C%20there%2C%20up%201.0%25%20of%20the%20population.&text=The median age of)  
606 [people in Geelong was 40 years.](https://www.abs.gov.au/census/find-census-data/quickstats/2016/203#:~:text=In the%202016%20Census%2C%20there%2C%20up%201.0%25%20of%20the%20population.&text=The median age of)
- 607 35. Fogg BJ. Persuasive technology: using computers to change what we think and do.  
608 *Ubiquity*. 2002;2002(December):5.
- 609 36. Hallsworth M, Snijders V, Burd H, Prestt J, Judah G, Huf S, et al. Applying behavioral  
610 insights: simple ways to improve health outcomes. *World Innov Summit Heal Doha,*  
611 *Qatar*, 29–30 Novemb. 2016;
- 612 37. Curve Tomorrow. Curve [Internet]. 2022 [cited 2022 Jul 29]. Available from:  
613 <https://www.curvetomorrow.com.au/>
- 614 38. American Psychiatric Association. *Diagnostic and Statistical Manual of Mental*  
615 *Disorders*. 5th ed. 3rd ed. Arlington, VA: American Psychiatric Publishing; 2013.
- 616 39. Goodman R. Psychometric properties of the strengths and difficulties questionnaire.  
617 *J Am Acad Child Adolesc Psychiatry*. 2001;40(11):1337–45.
- 618 40. Goodman R. The extended version of the Strengths and Difficulties Questionnaire as  
619 a guide to child psychiatric caseness and consequent burden. *J child Psychol*  
620 *psychiatry*. 1999;40(5):791–9.
- 621 41. Antony MM, Bieling PJ, Cox BJ, Enns MW, Swinson RP. Psychometric properties of  
622 the 42-item and 21-item versions of the Depression Anxiety Stress Scales in clinical  
623 groups and a community sample. *Psychol Assess*. 1998;10(2):176.
- 624 42. Crawford J, Cayley C, Lovibond PF, Wilson PH, Hartley C. Percentile norms and  
625 accompanying interval estimates from an Australian general adult population sample  
626 for self-report mood scales (BAI, BDI, CRSD, CES-D, DASS, DASS-21, STAI-X,  
627 STAI-Y, SRDS, and SRAS). *Aust Psychol*. 2011;46(1):3–14.
- 628 43. Broglio K. Randomization in clinical trials: permuted blocks and stratification. *Jama*.  
629 2018;319(21):2223–4.
- 630 44. Eysenbach G, CONSORT-EHEALTH Group. CONSORT-EHEALTH: improving and  
631 standardizing evaluation reports of Web-based and mobile health interventions. *J*  
632 *Med Internet Res*. 2011;13(4).
- 633 45. Elo S, Kyngäs H. The qualitative content analysis process. *J Adv Nurs*.  
634 2008;62(1):107–15.
- 635 46. Braun V, Clarke V. Using thematic analysis in psychology. *Qual Res Psychol*.  
636 2006;3(2):77–101.

637  
638  
639



640 **Supporting Information**

641

642 **S1 File. SPIRIT checklist.**

643 **S2 File. Participant Information Statement.**

644

645

646



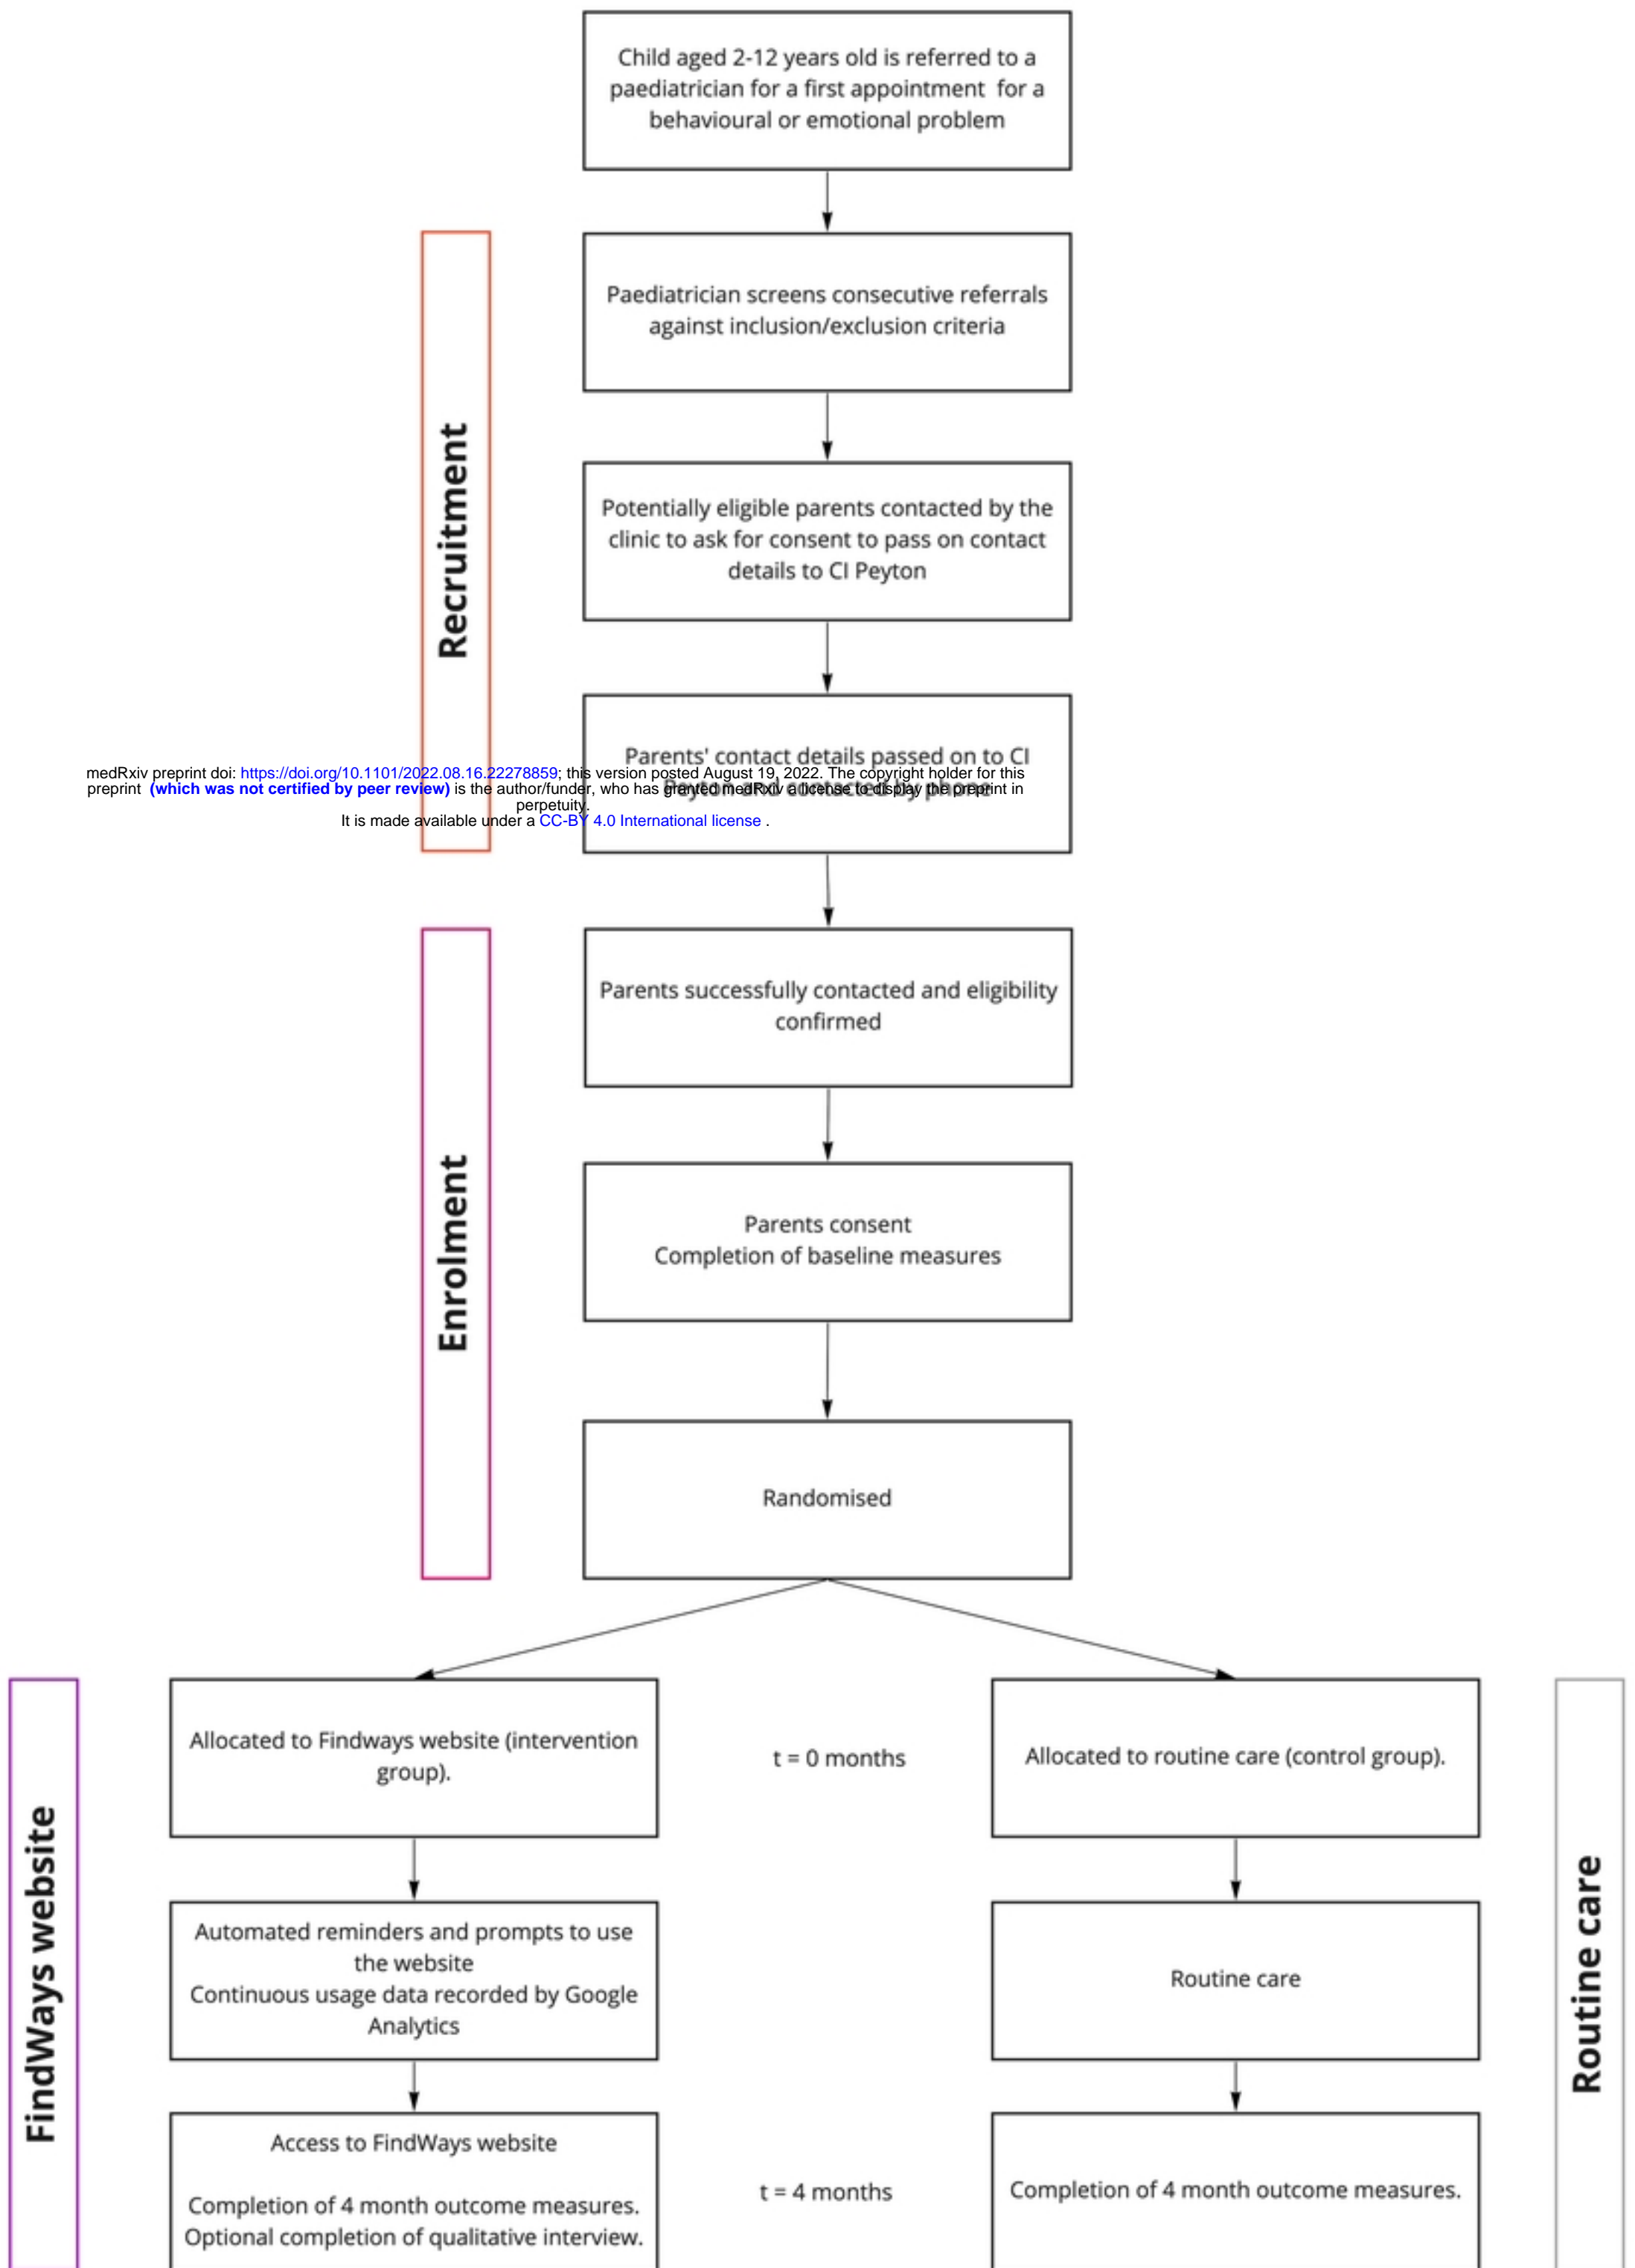

Fig 2
